# Supplementary material for: Using Digital Platforms to Promote Blood Donation: Motivational and Preliminary Evidence from Latin America and Spain
Source: MDPI journal article supplement (doi:10.3390/ijerph18084270), 2021-04-17
Supplement: s1 [file s1]

**Table S.2.1.** Participants' characteristics, health, blood donation and sociodemographic issues

|                                            |       |                                        |       |
|--------------------------------------------|-------|----------------------------------------|-------|
| <i>Health status</i>                       | (302) | <i>Age</i>                             | (297) |
| Not responding                             | 7.9   | Under 30 years                         | 8.2   |
| Very bad                                   | 0.3   | 30 to 39 years                         | 14.9  |
| Bad                                        | 2.0   | 40 to 49 years                         | 18.2  |
| Neither good nor bad                       | 14.6  | 50 to 59 years                         | 24.3  |
| Good                                       | 42.7  | 60 to 69 years                         | 19.9  |
| Very good                                  | 32.5  | 70 years and over                      | 14.5  |
| <i>Health system assessment</i>            | (302) | <i>Gender</i>                          | (298) |
| Very bad                                   | 13.2  | Male                                   | 54.7  |
| Bad                                        | 19.2  | Female                                 | 45.3  |
| Neither good nor bad                       | 33.8  |                                        |       |
| Good                                       | 26.8  | <i>Human capital (education level)</i> | (284) |
| Very good                                  | 7.0   | Primary                                | 10.2  |
|                                            |       | Secondary                              | 12.7  |
| <i>Blood donation</i>                      | (302) | University graduate                    | 40.1  |
| Not responding                             | 3.6   | Master or doctorate                    | 37.0  |
| Yes                                        | 50.0  |                                        |       |
| No                                         | 46.4  | <i>Occupational status</i>             | (284) |
|                                            |       | Self-employed and managers             | 20.4  |
| <i>5-years frequency of blood donation</i> | (151) | Qualified professionals                | 47.5  |
| Once                                       | 42.4  | Manual workers                         | 4.2   |
| Between 2 and 5 times                      | 47.7  | Non-manual workers                     | 9.2   |
| Between 3 and 10 times                     | 4.6   | Students                               | 7.4   |
| More than 10 times                         | 2.6   | Retirees                               | 7.2   |
|                                            |       | Unemployed                             | 4.1   |
| <i>Blood donation experience</i>           | (151) |                                        |       |
| Very bad                                   | 4.0   | <i>Activity sector</i>                 | (284) |
| Bad                                        | 1.3   | Agriculture/livestock                  | 2.1   |
| Neither good nor bad                       | 13.2  | Industry                               | 8.8   |
| Good                                       | 37.1  | Real state                             | 4.1   |
| Very good                                  | 43.7  | Commerce & Tourism                     | 10.6  |
|                                            |       | Professional & business services       | 11.6  |
| <i>General digital daily uses</i>          | (284) | Health & well-being                    | 18.0  |
| Browse and consulting internet / apps      | 85.2  | Education & research                   | 27.5  |
| Send and replay emails                     | 72.2  | Public administration                  | 17.3  |
| Participate in chats & social networks     | 70.4  |                                        |       |
| Participate in professional networks       | 38.0  | <i>Household status</i>                | (295) |
| P2P obtainer                               | 25.4  | Single-parent homes                    | 21.3  |
| P2P provider                               | 18.3  | Couple with children                   | 28.8  |
|                                            |       | Couple without children                | 24.5  |
| <i>Health digital daily uses</i>           | (284) | Other situations                       | 25.4  |
| Browse and consulting internet / apps      | 30.6  |                                        |       |
| Send and replay emails                     | 18.0  | <i>Locality</i>                        | (296) |
| Participate in chats & social networks     | 13.7  | Village or rural area                  | 14.1  |
| Participate in professional networks       | 13.0  | Small or mid-sized town/city           | 54.9  |
| P2P obtainer                               | 9.9   | Large town/city or metropolitan area   | 31.0  |
| P2P provider                               | 10.2  |                                        |       |
|                                            |       | <i>Country</i>                         | (302) |
|                                            |       | Chile                                  | 62.6  |
|                                            |       | Spain                                  | 11.2  |

|                                            |      |
|--------------------------------------------|------|
| Colombia                                   | 9.9  |
| Puerto Rico                                | 6.0  |
| Other Latin America countries <sup>1</sup> | 10.3 |

---

Notes: In brackets the number of participants. Valid percentages. 1. Distributed in small samples (from 2 to 5 participants) from Argentina, Bolivia, Costa Rica, Ecuador, Mexico, Peru, Uruguay and Venezuela.
