# Supplementary material for: Using Digital Platforms to Promote Blood Donation: Motivational and Preliminary Evidence from Latin America and Spain
Source: MDPI journal article supplement (doi:10.3390/ijerph18084270), 2021-04-17
Supplement: s1 [file s1]

**Table S.3.1.** Model items, descriptive and correlation statistics

| Construct/Items                           |                                                                       | Description | Mean | S.D.  | Skewness | Kurtosis | VIF   |
|-------------------------------------------|-----------------------------------------------------------------------|-------------|------|-------|----------|----------|-------|
| Trust in others (TRU)                     |                                                                       |             |      |       |          |          |       |
| TRU1                                      | Other CBD users are trustworthy                                       |             | 3.00 | 0.055 | -1.298   | 2.165    | 2.727 |
| TRU3                                      | Other CBD users usually keep my best interests in mind                |             | 2.98 | 0.054 | -1.203   | 2.120    | 2.725 |
| Modern lifestyle (MLS)                    |                                                                       |             |      |       |          |          |       |
| MLS1                                      | To me, CBD represents an up-to-date life style                        |             | 3.75 | 0.068 | -1.061   | 1.106    | 1.932 |
| MLS3                                      | CBD is in tune with the times                                         |             | 4.05 | 0.061 | -1.583   | 1.988    | 1.937 |
| Attitudes (ATT)                           |                                                                       |             |      |       |          |          |       |
| ATT1                                      | Using CBD is a good idea                                              |             | 4.12 | 0.061 | -1.384   | 2.141    | 3.591 |
| ATT2                                      | Using CBD is a wise idea                                              |             | 3.94 | 0.063 | -1.046   | 1.325    | 3.708 |
| ATT4                                      | Using CBD is pleasant                                                 |             | 3.43 | 0.057 | -0.408   | 1.230    | 1.554 |
| Subjective Norm (SBN)                     |                                                                       |             |      |       |          |          |       |
| SBN1                                      | People who are important to me think that I should participate in CBD |             | 3.15 | 0.064 | -0.495   | 0.463    | 2.325 |
| SBN3                                      | People whose opinions I value prefer that I participate in CBD        |             | 3.09 | 0.059 | -0.481   | 0.907    | 2.331 |
| Perceived behavioral control (PBC)        |                                                                       |             |      |       |          |          |       |
| PBC1                                      | I am able to use CBD                                                  |             | 3.68 | 0.070 | -0.969   | 0.702    | 1.731 |
| PBC2                                      | Using CBD is entirely within my control                               |             | 3.20 | 0.073 | -0.345   | -0.467   | 1.732 |
| Intention of collaborative donation (ICB) |                                                                       |             |      |       |          |          |       |
| ICD1                                      | I intend to use CBD in the future                                     |             | 3.66 | 0.069 | -0.869   | 0.467    | 1.813 |
| ICD2                                      | I will always try to use CBD in my daily life                         |             | 3.18 | 0.062 | -0.482   | 0.391    | 1.810 |
| Collaborative blood donation (CBD)        |                                                                       |             |      |       |          |          |       |
| CBD1                                      | I am familiar with CBD                                                |             | 2.14 | 0.076 | 0.884    | -0.384   | 2.684 |

|      |                            |      |       |       |       |       |
|------|----------------------------|------|-------|-------|-------|-------|
| CBD2 | I have experience with CBD | 1.81 | 0.069 | 1.334 | 0.944 | 2.687 |
|------|----------------------------|------|-------|-------|-------|-------|

Notes: CBS: Collaborative Blood Donation. N=302. Items measures based on 5-points Likert scale: 1 = strongly disagree; 2 = disagree; 3 = neither agree nor disagree; 4 = agree; 5 = strongly agree
